# Supplementary material for: Myxofibrosarcoma harboring an MLH1 pathogenic germline variant associated with Muir-Torre syndrome: a case report
Source: Springer Nature journal article supplement (doi:10.1186/s13053-021-00192-z), 2021-08-21
Supplement: MOESM1 [file 19588266]

# Supplementary Figure

(A)

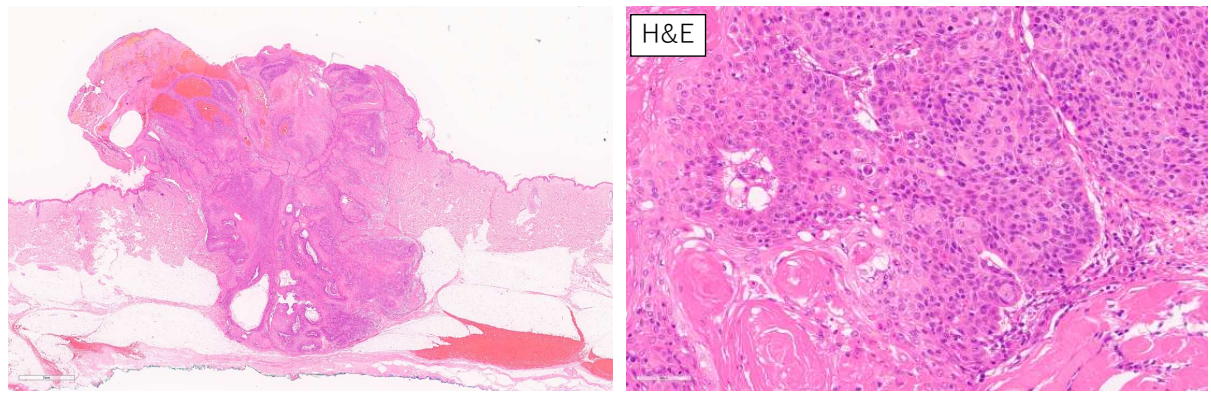

(B)

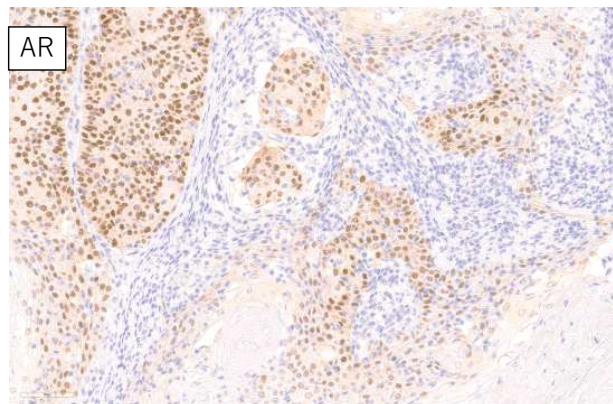

(C)

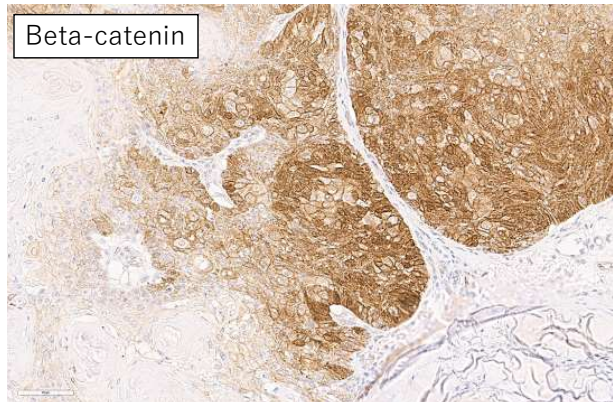

**Supplementary Figure. Representative histology of the cutaneous tumor.**

(A) Hematoxylin eosin staining of the cutaneous tumor. (B) IHC of androgen receptor (AR). AR is diffuse positive. (C) IHC of  $\beta$ -catenin.  $\beta$ -catenin is focally positive in the nuclei.
